# Supplementary material
Source: ML conference proceedings conference paper supplement (https://proceedings.neurips.cc/paper_files/paper/2017/hash/a34bacf839b923770b2c360eefa26748-Abstract.html)
Supplement: Supplementary file [file a34bacf839b923770b2c360eefa26748-Supplemental.zip]

## A Proof of Theorem 2

**Theorem 2** (Mass Transport Equation for Point Processes). *Let  $\lambda(t) := \lambda(t|\mathcal{H}_{t-})$  be the conditional intensity function of the point process  $N(t)$  and  $\tilde{\phi}(x, t) := \mathbb{P}[N(t) = x|\mathcal{H}_{t-}]$  be its conditional probability mass function; then  $\tilde{\phi}(x, t)$  satisfies the following differential-difference equation:*

$$\tilde{\phi}_t(x, t) := \frac{\partial \tilde{\phi}(x, t)}{\partial t} = \begin{cases} -\lambda(t)\tilde{\phi}(x, t) + \lambda(t)\tilde{\phi}(x-1, t) & \text{if } x = 1, 2, 3, \dots \\ -\lambda(t)\tilde{\phi}(x, t) & \text{if } x = 0 \end{cases} \quad (7)$$

*Proof.* For the simplicity of notation, we define a functional operator  $\mathcal{F}[\tilde{\phi}]$  as follows:

$$\mathcal{F}[\tilde{\phi}] = -\lambda(t)\tilde{\phi}(x, t) + \lambda(t)\tilde{\phi}(x-1, t)\mathbb{I}[x \geq 1],$$

where  $\mathbb{I}(\cdot)$  is an indicator function.

Our goal is to prove  $\tilde{\phi}_t = \mathcal{F}[\tilde{\phi}]$ . For the simplicity of notation, we define the inner product [11] between functions  $f(x)$  and  $g(x)$  as the summation of the product of  $f(x)$  and  $g(x)$ , where  $x \in \mathbb{N}$ :

$$(f, g) = \sum_{x=0}^{\infty} f(x)g(x)$$

To prove the equality  $\tilde{\phi}_t = \mathcal{F}[\tilde{\phi}]$ , we will prove that the equality  $(v, \tilde{\phi}_t) = (v, \mathcal{F}[\tilde{\phi}])$  holds for any test function  $v(x)$ . Then the equality  $\tilde{\phi}_t = \mathcal{F}[\tilde{\phi}]$  follows from the famous Fundamental Lemma of Calculus of Variations [15]. To show the above equality, we start by computing  $(v, \tilde{\phi}_t)$ .

**Computing  $(v, \tilde{\phi}_t)$ .** According to the definition of expectation and the fact that  $\tilde{\phi}(x, t)$  is the conditional probability mass, we have

$$\mathbb{E}[v(N(t))|\mathcal{H}_{t-}] = \sum_{x=0}^{\infty} v(x)\mathbb{P}[N(t) = x|\mathcal{H}_{t-}] = \sum_{x=0}^{\infty} v(x)\tilde{\phi}(x, t) = (v, \tilde{\phi}).$$

Taking the gradient with respect to  $t$  yields

$$\frac{\partial \mathbb{E}[v(N(t))|\mathcal{H}_{t-}]}{\partial t} = \sum_{x=0}^{\infty} v(x)\tilde{\phi}_t(x, t) = (v, \tilde{\phi}_t). \quad (8)$$

Next, we obtain another expression for  $(v, \tilde{\phi}_t)$ . First we show the following property of  $dv(N(t))$

$$dv(N(t)) = (v(N(t)+1) - v(N(t)))dN(t) \quad (9)$$

In fact, from the definition of the differential operator  $d$ , we have the following property:

$$dv(N(t)) := v(N(t+dt)) - v(N(t)) = v(N(t) + dN(t)) - v(N(t))$$

Since  $dN(t) = \{0, 1\}$ , if  $dN(t) = 0$ , we have  $dv(N(t)) = 0$ ; otherwise, we have  $dv(N(t)) = v(N(t)+1) - v(N(t))$ . For both cases, equation (9) holds.

Next, we integrate both sides of (9) on  $[0, t]$  and express  $v(N(t))$  as follows:

$$v(N(t)) = v(N(0)) + \int_0^t (v(N(s)+1) - v(N(s)))dN(s) \quad (10)$$

Given  $\mathcal{H}_{t-}$ , we take the conditional expectation of (10) and obtain the following expression:

$$\mathbb{E}[v(N(t))|\mathcal{H}_{t-}] = v(N(0)) + \mathbb{E}\left[\int_0^t (v(N(s)+1) - v(N(s)))\lambda(s)ds \middle| \mathcal{H}_{t-}\right] \quad (11)$$

Now we differentiate both sides of (11) with respect to time  $t$  and obtain the following expression:

$$\begin{aligned} \frac{\partial \mathbb{E}[v(N(t))|\mathcal{H}_{t-}]}{\partial t} &= \mathbb{E}\left[\frac{\partial}{\partial t} \int_{t_0}^t (\mathcal{B}[v](N(s)))ds \middle| \mathcal{H}(t^-)\right] \\ &= \mathbb{E}[\mathcal{B}[v](N(t))|\mathcal{H}_{t-}] \\ &= \sum_{x=0}^{\infty} \mathcal{B}[v](x(t))\tilde{\phi}(x, t) \\ &= (\mathcal{B}[v], \tilde{\phi}) \end{aligned} \quad (12)$$

where  $\mathcal{B}[v]$  is another functional operator defines as

$$\mathcal{B}[v](N(t)) = (v(N(t) + 1) - v(N(t)))\lambda(t) \quad (13)$$

Since (12) and (8) are equivalent, we have:

$$(v, \tilde{\phi}_t) = (\mathcal{B}[v], \tilde{\phi})$$

Now we have finished the first part of the proof. In the second part, our goal is to move the operator  $\mathcal{B}$  from test function  $v$  to the conditional probability mass function  $\phi$  and prove  $(\mathcal{B}[v], \tilde{\phi}) = (v, \mathcal{F}[\tilde{\phi}])$ . We start by computing  $(\mathcal{B}[v], \tilde{\phi})$  as follows.

**Computing  $(\mathcal{B}[v], \tilde{\phi})$ .** We define a new post-jump variable as  $y = x + 1$ , and conduct a *change of variable* from  $x$  to  $y = x + 1$  in  $(\mathcal{B}[v], \tilde{\phi})$ . Specifically, we express  $(\mathcal{B}[v], \tilde{\phi})$  as follows

$$\begin{aligned} \sum_{x=0}^{\infty} (v(x+1) - v(x))\lambda(t)\tilde{\phi}(x, t) &= \sum_{x=0}^{\infty} v(x+1)\lambda(t)\tilde{\phi}(x, t) - \sum_{x=0}^{\infty} v(x)\lambda(t)\tilde{\phi}(x, t) \\ &= \sum_{y=1}^{\infty} v(y)\lambda(t)\tilde{\phi}(y-1, t) - \sum_{x=0}^{\infty} v(x)\lambda(t)\tilde{\phi}(x, t) \end{aligned} \quad (14)$$

Next, we use an indicator function and let the value of  $y$  to start from 0 in the first term of (14):

$$\begin{aligned} \sum_{y=1}^{\infty} v(y)\lambda(t)\tilde{\phi}(y-1, t) &= \sum_{y=0}^{\infty} v(y)\lambda(t)\tilde{\phi}(y-1, t)\mathbb{I}[y \geq 1] \\ &= (v(y), \lambda(t))\tilde{\phi}(y-1, t)\mathbb{I}[y \geq 1] \end{aligned} \quad (15)$$

Now we substitute (15) back to (14) and obtain the following equation:

$$\begin{aligned} \sum_{x=0}^{\infty} (v(x+1) - v(x))\lambda(t)\tilde{\phi}(x, t) &= (v(y), \lambda(t))\tilde{\phi}(y-1, t)\mathbb{I}[y \geq 1] - (v(x), \lambda(t)\tilde{\phi}(x, t)) \\ &= (v(x), \lambda(t))\tilde{\phi}(x-1, t)\mathbb{I}[x \geq 1] - (v(x), \lambda(t)\tilde{\phi}(x, t)) \\ &= (v, \mathcal{F}[\tilde{\phi}]) \end{aligned} \quad (16)$$

Hence, for an arbitrary function  $v(x)$ , we have shown the following equality:

$$(v, \tilde{\phi}_t) = (\mathcal{B}[v], \tilde{\phi}) = (v, \mathcal{F}[\tilde{\phi}]).$$

This yields  $\tilde{\phi}_t = \mathcal{F}[\tilde{\phi}]$  and the proof is now complete.  $\square$

## B Proof of unbiasedness of the estimator for the probability mass function

We just need to show the following equality:  $\phi(x, t) = \mathbb{E}_{\mathcal{H}_{t-}}[\tilde{\phi}(x, t)]$ . For the simplicity of notation, we define the inner product between functions  $f(x)$  and  $g(x)$  as  $(f, g) := \sum_x f(x)g(x)$ , where  $x \in \mathbb{N}$ .

First, according to the definition of expectation, we have

$$\mathbb{E}[f(N(t))] := (f, \phi)$$

Next, from the definition of conditional probability mass,  $g(\mathcal{H}_{t-})$  can be expressed as

$$g(\mathcal{H}_{t-}) = \sum_x f(x)\tilde{\phi}(x, t) = (f, \tilde{\phi}) \quad (17)$$

Taking expectation to both sides of (17) yields

$$\mathbb{E}_{\mathcal{H}_{t-}}[g(\mathcal{H}_{t-})] = (f, \mathbb{E}_{\mathcal{H}_{t-}}[\tilde{\phi}])$$

Finally, since  $\mathbb{E}[f(N(t))] = \mathbb{E}_{\mathcal{H}_{t-}}[g(\mathcal{H}_{t-})]$ , we have  $(f, \tilde{\phi}) = (f, \mathbb{E}_{\mathcal{H}_{t-}}[\tilde{\phi}])$ , which holds for an arbitrary function  $f$ . Hence the equality  $\mathbb{E}_{\mathcal{H}_{t-}}[\tilde{\phi}] = \phi$  follows from the Fundamental Lemma of Calculus of Variations [15].

## C Proof of Theorem 1

**Theorem 1.** For time  $t > 0$  and an arbitrary function  $f$ , we have:

$$\mathbb{V}\mathbb{A}\mathbb{R}[g(\mathcal{H}_{t-})] < \mathbb{V}\mathbb{A}\mathbb{R}[f(N(t))] \quad (18)$$

*Proof.* The proof contains two steps. We first compute the expected value of the conditional variance  $\mathbb{E}[\mathbb{V}\mathbb{A}\mathbb{R}[f(N(t))|\mathcal{H}_{t-}]]$ , and next compute the variance of the conditional expected value  $\mathbb{V}\mathbb{A}\mathbb{R}[g(\mathcal{H}_{t-})]$ .

(i) *Expected value of the conditional variance.* Since  $\mathbb{V}\mathbb{A}\mathbb{R}[f(N(t))|\mathcal{H}_{t-}]$  is a random variable, we can compute its expected value. Using the definition of variance, i.e.,  $\mathbb{V}\mathbb{A}\mathbb{R}[f(N(t))|\mathcal{H}_{t-}] = \mathbb{E}[f(N(t))^2|\mathcal{H}_{t-}] - [\mathbb{E}[f(N(t))|\mathcal{H}_{t-}]]^2$ , we have

$$\mathbb{E}[\mathbb{V}\mathbb{A}\mathbb{R}[f(N(t))|\mathcal{H}_{t-}]] = \mathbb{E}[\mathbb{E}[f(N(t))^2|\mathcal{H}_{t-}]] - \mathbb{E}[\mathbb{E}[f(N(t))|\mathcal{H}_{t-}]^2] \quad (19)$$

$$= \mathbb{E}[f(N(t))^2] - \mathbb{E}[\mathbb{E}[f(N(t))|\mathcal{H}_{t-}]^2] \quad (20)$$

(ii) *Variance of the conditional expected value.* We express  $\mathbb{V}\mathbb{A}\mathbb{R}[g(\mathcal{H}_{t-})]$  as follows

$$\mathbb{V}\mathbb{A}\mathbb{R}[g(\mathcal{H}_{t-})] = \mathbb{V}\mathbb{A}\mathbb{R}[\mathbb{E}[f(N(t))|\mathcal{H}_{t-}]] \quad (21)$$

$$= \mathbb{E}[\mathbb{E}[f(N(t))|\mathcal{H}_{t-}]^2] - [\mathbb{E}[\mathbb{E}[f(N(t))|\mathcal{H}_{t-}]]]^2 \quad (22)$$

$$= \mathbb{E}[\mathbb{E}[f(N(t))|\mathcal{H}_{t-}]^2] - \mathbb{E}[f(N(t))]^2 \quad (23)$$

Combining (20) and (23) yields the following equation:

$$\mathbb{V}\mathbb{A}\mathbb{R}[g(\mathcal{H}_{t-})] + \mathbb{E}[\mathbb{V}\mathbb{A}\mathbb{R}[f(N(t))|\mathcal{H}_{t-}]] = \mathbb{V}\mathbb{A}\mathbb{R}[N(t)]$$

Next, we show that the inequality in our theorem is strict. According to the definition of counting process, we have  $N(0) = 0$ . Moreover, we are only interested in the scenarios where the number of events are positive, i.e.,  $N(t) > 0$  for future time  $t > 0$ . Since the point process  $N(t)$  is right continuous and not a predictable process [4], we obtain the fact that conditioning on  $\mathcal{H}_{t-}$ , there is a stochastic jump at time  $t$  and the value of  $f(N(t))$  is random and not a constant. Hence the conditional variance  $\mathbb{V}\mathbb{A}\mathbb{R}[f(N(t))|\mathcal{H}_{t-}]$  is positive and we have  $\mathbb{E}[\mathbb{V}\mathbb{A}\mathbb{R}[f(N(t))|\mathcal{H}_{t-}]] > 0$ . The proof is now complete.  $\square$

## D Details on the Runge-Kutta (RK) method

We present details of the RK method. For the simplicity of notation, we set  $\tilde{\phi}'(t) = \mathbf{f}(\tilde{\phi}, t) = \mathbf{Q}(t)\tilde{\phi}(t)$ .

The RK method divides the interval  $[t_k, t_{k+1}]$  into intervals  $[\tau_i, \tau_{i+1}]$ , for  $i = 0, \dots, I$ , with  $\Delta\tau = \tau_{i+1} - \tau_i$ . This method conducts linear extrapolation on contiguous subintervals  $[\tau_i, \tau_{i+1}]$ . Specifically, it starts from  $\tau_0 := t_k$ , and within  $[\tau_0, \tau_1]$  the RK method of *stage*  $s$  computes  $\mathbf{y}_m = \mathbf{f}(\tilde{\phi}_m, \tau_0 + \Delta\tau c_m)$  at  $s$  recursively defined input locations, for  $m = 1, \dots, s$ , where  $\tilde{\phi}_m$  is computed as a linear combination of previous  $\mathbf{y}_{n < m}$  as  $\tilde{\phi}_m = \tilde{\phi}_0 + \Delta\tau \sum_{n=1}^{m-1} w_{mn} \mathbf{y}_n$ . Then, it returns the prediction for the solution at  $\tau_1$  as  $\tilde{\phi}(\tau_0 + \Delta\tau)$ . In the compact form,

$$\mathbf{y}_m = \mathbf{f}\left(\tilde{\phi}_0 + \Delta\tau \sum_{n=1}^{m-1} w_{mn} \mathbf{y}_n, \tau_0 + \Delta\tau c_m\right), \quad m = 1, \dots, s, \quad \tilde{\phi}(\tau_0 + \Delta\tau) = \tilde{\phi}_0 + \Delta\tau \sum_{m=1}^s b_m \mathbf{y}_m$$

Next,  $\tilde{\phi}(\tau_0 + \Delta\tau)$  is taken as the initial value for  $\tau_1 = \tau_0 + \Delta\tau$  and the process is repeated until  $\tau_I := t_{k+1}$ . Note that RK outputs the conditional probability mass at all timestamps  $\{\tau_i\}$ ; hence it captures the mass transport on  $[t_k, t_{k+1}]$ .

The main computation in RK is the matrix-vector product. Since the matrix  $\mathbf{Q}(t)$  is sparse and bi-diagonal with  $O(M)$  non-zero elements, the cost for this operation is only  $O(M)$ .
